# Supplementary material
Source: HighWire-hosted journal article supplement (https://www.jpn.ca/highwire/filestream/89793/field_highwire_adjunct_files/0/jpn-110188-1-at.pdf)
Supplement: jpn-110188-1-at.pdf [file jpn-110188-1-at.pdf]

DOI: 10.1503/jpn.110188

Copyright © 2012 The Author(s) or their employer(s). To receive this resource in an accessible format, please contact us at [cmajgroup@cmaj.ca](mailto:cmajgroup@cmaj.ca).

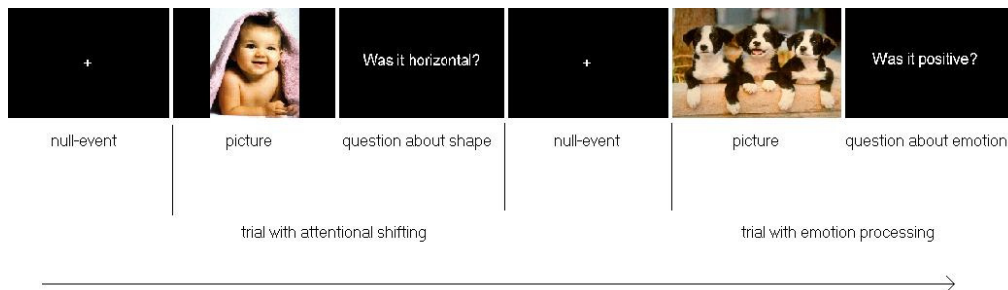

**Fig. S1:** The structure of the emotional processing–attention shifting task. Two trials are presented with alternated null events. The first trial is an attention shifting trial, the second an emotion processing trial.

**Table S1: Neural activation in the healthy controls with family history of major depressive disorder relative to other groups in emotion processing and attention shifting divided separately for different types of stimuli**

| Comparison; brain region                                           | Cluster size, no. voxels | MNI coordinate |          |          | Cluster-corrected <i>p</i> value |
|--------------------------------------------------------------------|--------------------------|----------------|----------|----------|----------------------------------|
|                                                                    |                          | <i>x</i>       | <i>y</i> | <i>z</i> |                                  |
| <b>HC-FHP &gt; MDD-FHP: emotion processing of positive stimuli</b> |                          |                |          |          |                                  |
| Left superior occipital gyrus                                      | 765                      | -15            | -85      | 25       | < 0.001                          |
| Left middle occipital gyrus                                        |                          | -15            | -88      | 13       |                                  |
| Left angular gyrus                                                 |                          | -33            | -55      | 22       |                                  |
| <b>HC-FHP &gt; MDD-FHP: attention shifting of negative stimuli</b> |                          |                |          |          |                                  |
| Left superior occipital gyrus                                      | 798                      | -21            | -79      | 25       | < 0.001                          |
| Left middle/ anterior cingulate cortex                             |                          | -3             | -16      | 34       |                                  |
| <b>HC-FHP &gt; MDD-FHP: attention shifting of neutral stimuli</b>  |                          |                |          |          |                                  |
| Left postcentral gyrus                                             | 601                      | -36            | -25      | 40       | < 0.001                          |
| Left inferior parietal gyrus                                       |                          | -30            | -37      | 40       |                                  |
| Left supplementary motor area                                      | 199                      | -3             | 8        | 46       | 0.001                            |
| Right superior frontal gyrus                                       |                          | 15             | 17       | 46       |                                  |
| Right supplementary motor area                                     |                          | 9              | 8        | 49       |                                  |
| <b>MDD-FHP &gt; HC-FHP: attention shifting of negative stimuli</b> |                          |                |          |          |                                  |
| Left cerebellum 4_5                                                | 205                      | -9             | -58      | -20      | 0.001                            |
| Left fusiform/ parahippocampal gyrus                               |                          | -27            | -43      | -14      |                                  |
| Right cerebellum 6                                                 |                          | 21             | -55      | -23      |                                  |
| <b>HC-FHP &gt; HC-FHN: emotion processing of negative stimuli</b>  |                          |                |          |          |                                  |
| Left inferior parietal gyrus                                       | 452                      | -54            | -40      | 40       | < 0.001                          |
| Left postcentral gyrus                                             |                          | -57            | -19      | 43       |                                  |
| <b>HC-FHP &gt; HC-FHN: attention shifting of negative stimuli</b>  |                          |                |          |          |                                  |
| Right middle cingulate cortex                                      | 313                      | 3              | -19      | 34       | < 0.001                          |
| Left middle cingulate cortex                                       |                          | -9             | -22      | 37       |                                  |
| Left postcentral gyrus                                             |                          | -36            | -16      | 34       |                                  |
| <b>HC-FHP &gt; HC-FHN: attention shifting of positive stimuli</b>  |                          |                |          |          |                                  |
| Left middle occipital gyrus                                        | 146                      | -33            | -73      | 25       | 0.006                            |
| Left superior occipital gyrus                                      |                          | -24            | -79      | 28       |                                  |
| Left cuneus                                                        |                          | -9             | -76      | 25       |                                  |
| <b>HC-FHP &gt; HC-FHN: attention shifting of neutral stimuli</b>   |                          |                |          |          |                                  |
| Left inferior parietal gyrus                                       | 141                      | -45            | -28      | 40       | 0.007                            |

HC-FHN = healthy controls without family history of MDD; HC-FHP = healthy controls with family history of MDD; MDD = major depressive disorder; MDD-FHP = patients with MDD with family history of MDD; MNI = Montreal Neurological Institute.
